# Supplementary material for: Adiposity-Related Heterogeneity in Patterns of Type 2 Diabetes Susceptibility Observed in Genome-Wide Association Data
Source: Oxford University Press journal article supplement (doi:10.2337/db08-0906), 2008-12-04
Supplement: db08-09061_suppl.doc [file db08-09061_suppl.doc]

**Supplementary Information/Online Appendix**

**Samples**

**WTCCC**: Cases had a diagnosis of diabetes based on either current prescribed treatment with diabetes-specific medication or, in the case of those treated with diet alone, historical or contemporary laboratory evidence of hyperglycemia (as defined by the World Health Organization). Other forms of diabetes were excluded by standard clinical criteria based on personal and family history. These cases were enriched for early age of diagnosis (most below 70y) and positive family history.

Equal numbers of UK controls came from the 1958 Birth Cohort and the UK Blood Service Collection (blood donors ascertained through the National Blood Transfusion Service; UKBS controls). All subjects gave written informed consent and the project protocols were approved by the relevant research ethics committees in the UK.

**UK T2D Genetics Consortium (RSA)**: all cases and controls were of European White descent, living in the Tayside region of Dundee. Cases had T2D diagnosed between the ages of 35-70 years (inclusive). Diagnosis was based on either current prescribed treatment with diabetes-specific medication or, in the case of individuals treated with diet alone, laboratory evidence of hyperglycemia as defined by the World Health Organization. Patients were excluded if they had an established (clinical and/or molecular) diagnosis of monogenic diabetes (e.g. maturity-onset diabetes of the young, mitochondrial diabetes) or if they had been treated with regular insulin therapy within 1 year of diagnosis.

Controls were aged below 80 years and had not been diagnosed with diabetes at the time of recruitment (or subsequently). Control subjects were excluded from analysis if laboratory investigations at the time of recruitment provided evidence of hyperglycaemia (fasting glucose >7.0 mmol/l, HbA1c >6.4%). This study was approved by the Tayside Medical Ethics Committee and informed consent was obtained from all subjects. RSA comprised subjects taken from both RS1 and RS3 of the previously reported studies.

**UK T2D cases and EFSOCH controls (RSB)**: The T2D cases were UK Whites derived from two sources: 202 were taken from a collection of young-onset T2D subjects (diagnosed before age 45y) who had been subjected to extensive analysis to exclude other causes of diabetes. The remaining 430 were isolated T2D cases (age of diagnosis below 65y). Both subsets met the same criteria for T2D diagnosis described for the WTCCC cases. These cases were collected in a number of UK centres but ~60% come from SouthWest England. All subjects gave written informed consent and the project protocols were approved by the relevant research ethics committees in the UK.

The controls were made up of parents from a consecutive birth cohort (EFSOCH: the Exeter Family Study of Child Health): only those with normal (<6.0mmol/l) fasting glucose and/or normal HbA1c levels (<6.0%; Diabetes Control and Complications trial corrected) were included. Ethical approval was given by the North and East Devon Local Research Ethics Committee and informed consent was obtained from the parents of the newborns.

**Genotyping**

For the WTCCC samples, genotyping is derived from the Affymetrix 500k chip, details of which have been previously reported (1;7). Samples with low concentrations, evidence of degradation, poor PCR performance, or gender discrepancies with the stated information were rejected. Approved samples were re-arrayed into 96-well plates and shipped to California for genotyping. Whole genome SNP genotyping was performed with the commercial release of the GeneChip® 500K Mapping Array Set at Affymetrix’ Service Facility. Affymetrix delivered successful samples as those having a DM call rate of 93% at p 0.33 for each array, over 90% concordance for SNPs common to the two arrays, cross-chip agreement gender and over 70% identity to the molecular fingerprinting genotypes previously generated. Intensity files generated from the .cel files for each sample were quantile-normalized and genotypes called using a novel calling algorithm (Chiamo++).

In this case of the follow-up samples from both the UKT2D and Dundee sets, genotyping was performed by Kbiosciences (www.kbioscience .co.uk, Herts., UK). Kbiosciences designed and used assays based on either their proprietary competitive allele specific PCR system (KASPar) method or modified TaqMan assays, details of which are available (<http://www.kbioscience.co.uk/chemistry/index.htm>). All assays were validated prior to use, using a standard 96-well validation plate used by Kbiosciences and 295 samples from the WTCCC study. In the case of rs13266634 (*SLC30A8*), genotyping for the WTCCC was performed by KBioscience in the same way as the Affymetrix chip failed to capture this variant.

**Analyses**

**GWA data:** To explore the role of alternative case ascertainment strategies, we used GWA data from the T2D component of the Wellcome Trust Case Control Consortium. As described previously (1; 7; 8), GWA data from the Affymetrix 500k array were available for 1924 T2D cases and 2938 controls. The geometric mean (95% CI) for BMI in cases was 30.7 (30.4, 30.9) kgm-2, whilst that of the controls was appreciably lower (UK Blood Services controls [n=1437 with data available] 25.9 (25.7, 26.1) kgm-2; 1958 Birth Cohort [n=1479] 27.0 (26.0, 28.0) kgm-2). We restricted the present analysis to the 393,453 autosomal SNPs with minor allele frequency (MAF) exceeding 1% in both cases and controls, and no extreme departures from Hardy-Weinberg equilibrium (HWE) (p<10-4 in cases or controls). This data set shows no evidence of substantial confounding from population substructure or genotyping error (1; 7; 8).

**Replication data:** T2D case-control replication sample sets [RS1, RS2, RS3], as previously reported (1), formed the basis of the replication set. Since RS1 and RS3, as designated by Zeggini and colleagues (1), represented two tranches of samples with identical ascertainment derived from a single study (the UK Type 2 Diabetes Genetics Consortium Collection), these were combined into a single sample, RSA (RSA: 3125 cases vs 3596 controls). RSB is identical to the previously designated RS2 and comprises 632 UK T2D cases and 1750 controls. RSA had geometric mean BMI for cases and controls of 31.6 (31.4, 31.8) and 26.8 (26.6, 26.9) kgm-2 respectively. For RSB, geometric means of BMI for cases and controls were 32.1 (31.6, 32.6) and 25.3 (25.1, 25.5) kgm-2 respectively. The smaller RSB sample was not included in all replication studies owing to the finding of null results within the larger RSA replication sample. Full clinical characteristics for these samples can be found in the supplementary methods. Details of genotyping have been reported previously (1; 7; 8). We also used data from the DGI and FUSION GWA scans (3-5) and a large-scale (n=16,876) GWA meta-analysis conducted for BMI (10) as additional replication sources.

**Analysis strategy:** Overall study design is summarized in **Supplementary** **Figure S1**. To evaluate the impact of alternative strategies for T2D-case ascertainment on GWA findings, we divided the WTCCC T2D-cases into two strata of equal size (“non-obese” T2D and “obese” T2D) using the median case BMI (30.2kgm-2), and then performed a genomewide association analysis, comparing each case-stratum with the full group of 2938 controls. These analyses were performed under the additive model using previously-reported procedures (7; 8; 22; 23) (supplementary reference S1). For association signals of primary interest, such as those in the known T2D susceptibility loci, we used multinomial logistic regression methods (“mlogit”: STATA version 10, see supplementary methods) to generate T2D effect estimates by stratum (measured as relative risk ratios [RR]) and to test whether T2D-association effect sizes differed between the strata, taking into full account the common control group. These tests for the between-stratum difference in effect-size estimates are reported as pdiff.

For variants displaying evidence of between-stratum heterogeneity of T2D-association effect size, we sought confirmation in replication samples, again comparing BMI-stratified T2D cases against the full set of controls. For the primary analysis of the RSA and RSB genotypes, we used the same case-stratification threshold as employed for the GWA analysis (i.e. 30.2 kgm-2). Since this generally resulted in case strata of unequal size, thereby potentially reducing power, we performed “sensitivity” analyses which employed study-specific thresholds (the median BMI of the cases for that study). However, the results from these did not differ substantively from those obtained from the primary analyses, and are therefore not shown. Meta-analysis of the WTCCC and replication data was performed using “metan” (STATA v10). For variants showing evidence for BMI-related differences in effect-size estimates, association with sex-specific, z-score-standardised BMI values was assessed by simple linear regression under an additive model using “regress” (STATA v10).

We also conducted an exploratory genome-wide analysis of between-strata differences in effect size, for which we used the Breslow Day test (supplementary reference 1) for heterogeneity between odds ratios in a design where BMI defined cases strata were compared to a random half of the WTCCC control set. We combined data from this “heterogeneity” analysis with those from the T2D association results themselves to identify additional loci with the most compelling evidence for between-strata differences in the strength of their association with T2D.

**Combining data from correlated variants:** In the case of *TCF7L2,* the variant displaying the strongest T2D signal in the WTCCC GWA was rs7901695. However, for this locus, only genotypes at rs7903146 were available in RSA and RSB. These two variants have a pairwise r2 in CEU HapMap of 0.8. We used two complementary approaches to combine analysis of the GWA and RS data for *TCF7L2.* In the first (“naïve”), we performed a simple combination of the effect size estimates for rs7901695 (from GWA data) and rs7903146 (from the RS data). In the second (“imputed”), we used the program IMPUTE (supplementary reference S2) to impute rs7903146 genotypes for the WTCCC GWA samples, and then used the combination of imputed (GWA) and directly-typed (RS) data for rs790314 in the analysis. Imputation of rs7901346 genotypes was of high quality (consistent posterior probability >98%).

For analysis by BMI strata, the command “mlogit” (STATA v10) was used which performs a multinomial logistic regression taking into account appropriately the use of the same pool of controls for the generation of stratified estimates by fitting fits maximum-likelihood multinomial logit models. These estimates may then be compared formally to give a indication of the effect of stratification of cases

(“test [betaSTRATA1] = [betaSTRATA2]”).

**Further study details:**

**References:**

(S1) Purcell S, Neale B, Todd-Brown K, Thomas L, Ferreira AR, Bender D, Maller J, Sklar P, de Bakker PIW, Daly M, Sham PC: PLINK: A tool for whole-genome association and population-based linkage analyses. *American Journal of Human Genetics* 81:559-575, 2007

(S2) Marchini J, Howie BN, Myers S, McVean GAT, Donnelly P: A new multipoint methods for genome-wide association association studies by imputation of genotypes. *Nature Genetics* 39:906-913, 2007

.

**Table S1. BMI-stratified analyses for other confirmed T2D-susceptibility and novel loci in GWA and RS samples.**

|  | Obese T2D vs controls | | | | Nonobese T2D vs controls | | | | |
| --- | --- | --- | --- | --- | --- | --- | --- | --- | --- |
| Region/Gene | Obese T2D  RSA  (1718/3596) | P  RSA | **WTCCC + RS** | passoc | Non-obese T2D  RSA  (1407/3596) | P  RSA | **WTCCC + RS** | passoc | **pdiff** |
| rs7132480  (Chr 12) | 0.94  (0.86, 1.02) | 0.1 | **1.00**  **(0.93, 1.07)** | 0.95 | 1.01  (0.92, 1.11) | 0.8 | **1.14**  **(1.06, 1.22)** | 0.0003 | **0.003** |
| rs901130  (Chr 15) | 0.97  (0.88, 1.07) | 0.6 | **1.09**  **(1.02, 1.18)** | 0.01 | 0.96  (0.85, 1.05) | 0.4 | **0.99**  **(0.92, 1.06)** | 0.7 | **0.01** |
| rs16827446  (Chr 3) | 0.96  (0.83, 1.11) | 0.6 | **1.14**  **(1.04, 1.26)** | 0.005 | 1.005  (0.86, 1.18) | 0.95 | **0.97**  **(0.88, 1.07)** | 0.53 | **0.007** |
| rs1497313  (Chr 3) | 1.03  (0.93, 1.14) | 0.6 | **1.13**  **(1.03, 1.23)** | 0.007 | 1.05  (0.94, 1.17) | 0.4 | **1.01**  **(0.92, 1.11)** | 0.8 | **0.07** |
| rs917836  (Chr 18) | 0.84  (0.69, 1.02) | 0.08 | **0.87**  **(0.75, 1.02)** | 0.08 | 0.98  (0.80, 1.20) | 0.8 | **1.21**  **(1.05, 1.40)** | 0.01 | **0.001** |

Stratification in the RS samples is based on the case median BMI from WTCCC (30.2kgm-2). Numbers in column headers refer to number of cases and controls overall. RR estimates by strata are generated from multinomial logistic regression. For meanings of “imputed” and “naive” analyses, see Supplementary Information. passoc represents p value for T2D association derived from meta-analysis including WTCCC data; pdiff represents a test for between-strata heterogeneity in the meta-analysis data.

| SNP  (Chr) | Obese  T2D versus controls  (958/2938) | Non-obese T2D versus controls  (955/2938) | pdiff | Breslow Day estimate of stratification effect | WTCCC cases  Log10BMI  association | n | p(BMI)assoc | WTCCC NBS controls  Log10BMI  Association | n | WTCCC 1958BC controls  Log10BMI  Association | n | WTCCC META controls  Log10BMI  Association | p(BMI)assoc |
| --- | --- | --- | --- | --- | --- | --- | --- | --- | --- | --- | --- | --- | --- |
| rs16827446  (Chr 3) | 1.29  (1.14, 1.45) | 0.94  (0.83, 1.07) | 7.7x10-5 | 5.7x10-4 | 0.11  (0.03, 0.19) | 1912 | 0.004 | -0.005  (-0.09, 0.08) | 1430 | 0.08  (-0.04, 0.27) | 1480 | 0.021  (-0.05, 0.09) | 0.5 |
| rs1497313  (Chr 3) | 1.42  (1.21, 1.68) | 0.89  (0.73, 1.08) | 2.6 x10-5 | 2.5x10-4 | 0.16  (0.05, 0.27) | 1908 | 0.003 | -0.02  (-0.15, 0.11) | 1435 | 0.10  (0.01, 0.23) | 1480 | 0.06  (-0.01, 0.13) | 0.1 |
| rs917836  (Chr 18) | 0.92  (0.73, 1.18) | 1.52  (1.23, 1.88) | 4.0 x10-4 | 9.8x10-4 | -0.12  (-0.25, 0.01) | 1901 | 0.07 | 0.005  (-0.16, 0.17) | 1428 | -0.005  (-0.17, 0.25) | 1480 | 0.000  (-0.12, 0.12) | 0.998 |

**Table S2. Additional loci with evidence of stratification arising from genomewide scan for effect-size heterogeneity and their relationship with both T2D and BMI.**

Numbers in column headers refer to number of cases and controls. RR estimates by strata are generated from multinomial logistic regression. passoc represents p value for BMI association derived from linear regression; pdiff represents a test for between-strata heterogeneity. Columns headed n indicate number if individuals in each analysis. p(BMI)assoc represent overall results for the association of SNPs with BMI in cases and controls in the WTCCC respectively. Relationships with BMI are summarised by beta effect estimates from the regression of sex specific log10 BMI Z-scores.

**Table S3. BMI-stratified tests of T2D association for known T2D-susceptibiltiy loci within WTCCC-GWA.**

| SNP | Gene | Overall T2D association  (1924/2938) | passoc | **Obese T2D versus controls**  **(958/2938)** | passoc | **Non-obese T2D versus controls**  **(955/2938)** | passoc | **pdiff** |
| --- | --- | --- | --- | --- | --- | --- | --- | --- |
| rs10811661 | *CDKN2B* | 1.22  (1.09, 1.37) | 0.001 | **1.17**  **(1.01, 1.35)** | 0.03 | **1.27**  **(1.09, 1.47)** | 0.002 | **0.4** |
| rs10946398 | *CDKAL* | 1.20  (1.10, 1.31) | 0.00003 | **1.16**  **(1.04, 1.29)** | 0.007 | **1.25**  **(1.12, 1.39)** | 0.00005 | **0.3** |
| *rs5015480 | *HHEX* | 1.22  (1.12, 1.33) | 5.6x10-6 | **1.24**  **(1.11, 1.38)** | 0.0002 | **1.22**  **(1.09, 1.36)** | 0.0004 | **0.8** |
| †rs13266634 | *SLC30A8* | 1.12  (1.02, 1.23) | 0.02 | **1.04**  **(0.92, 1.17)** | 0.5 | **1.21**  **(1.06, 1.37)** | 0.003 | **0.06** |
| rs4402960 | *IGF2BP2* | 1.15  (1.05, 1.25) | 0.002 | **1.20**  **(1.08, 1.34)** | 0.001 | **1.09**  **(0.98, 1.22)** | 0.1 | **0.2** |
| rs564398 | *CDKN2B* | 1.16  (1.07, 1.26) | 0.0003 | **1.17**  **(1.05, 1.30)** | 0.003 | **1.16**  **(1.05, 1.30)** | 0.004 | **0.96** |
| rs2934381 | *NOTCH2* | 1.11  (0.97, 1.25) | 0.1 | **1.11**  **(0.951.30)** | 0.2 | **1.11**  **(0.95, 1.30)** | 0.2 | **0.99** |
| ‡rs7578597 | *THADA* | 1.20  (1.04, 1.39) | 0.01 | **1.21**  **(1.01, 1.47)** | 0.04 | **1.19**  **(0.99, 1.44)** | 0.06 | **0.9** |
| rs4607103 | *ADAMTS9* | 1.14  (1.03, 1.26) | 0.01 | **1.16**  **(1.32, 1.02)** | 0.02 | **1.13**  **(1.01, 1.28)** | 0.07 | **0.7** |
| rs864745 | *JAZF1* | 1.17  (1.08, 1.27) | 0.0002 | **1.15**  **(1.04, 1.28)** | 0.007 | **1.19**  **(1.07, 1.32)** | 0.001 | **0.7** |
| ‡rs12779790 | *CDC123/CAMK1D* | 1.16  (1.04, 1.30) | 0.008 | **1.17**  **(1.01, 1.34)** | 0.03 | **1.17**  **(1.01, 1.34)** | 0.03 | **0.99** |
| rs7961581 | *TSPAN/LGR5* | 1.23  (1.13, 1.35) | 3.8x10-6 | **1.22**  **(1.09, 1.36)** | 0.001 | **1.24**  **(1.11, 1.38)** | 0.0002 | **0.8** |
| rs757210 | *HNF1B* | 1.07  (0.96, 1.19) | 0.2 | **1.06**  **(0.93, 1.21)** | 0.4 | **1.08**  **(0.95, 1.24)** | 0.2 | **0.8** |
| rs10010131 | *WFS1* | 1.10  (1.01, 1.19) | 0.04 | **1.07**  **(0.95, 1.18)** | 0.2 | **1.13**  **(1.01, 1.23)** | 0.03 | **0.4** |
| rs1801282 | *PPARG* | 1.19  (1.08, 1.29) | 0.001 | **1.22**  **(1.08, 1.34)** | 0.004 | **1.17**  **(1.02, 1.30)** | 0.03 | **0.6** |
| rs5219 | *KCNJ11* | 1.17  (1.07. 1.28) | 0.001 | **1.08**  **(0.96, 1.21)** | 0.2 | **1.27**  **(1.13, 1.43)** | 0.00006 | **0.03** |

Numbers in column headers refer to number of cases and controls. RR estimates by strata are generated from multinomial logistic regression. passoc represents p value for T2D association derived from meta-analysis including WTCCC data; pdiff represents a test for between-strata heterogeneity. *denotes meta analysis only based on rs5015480 and the perfect proxy rs1111875 in RSA and RSB. † rs13266634 (*SlC30A8*) was not well captured by the Affymetrix chip, so WTCCC data derived from bespoke genotyping. ‡ indicates imputed genotype data.

**Table S4.**

Results from tests of association between the gene variants and BMI across all non-stratified studies.

| Gene/SNP | SNP/Study | Case effect  (95%CI) | n | p | Control effect  (95%CI)  [n] | | | | p |
| --- | --- | --- | --- | --- | --- | --- | --- | --- | --- |
| *FTO*  *(rs8050136)* | WTCCC – 58BC/UKBS | 0.15  (0.08, 0.21) | 1904 | 9.7x10-6 | 0.05  (-0.02, 0.13) | [1436] | 0.05  (-0.03, 0.15) | [1480] | 0.06* |
| RSA | 0.10  (0.05, 0.15) | 2975 | 0.00006 | 0.07  (0.03, 0.11) | | [3436] | | 0.0006 |
| RSB | 0.16  (0.05, 0.27) | 609 | 0.004 | 0.10  (0.04, 0.16) | | [1542] | | 0.0009 |
| **META-ANALYSIS** | **0.13**  **(0.09, 0.16)** | **-** | **5.8x10-11** | **0.07**  **(0.04, 0.10)** | | | | **8.4x10-7** |
| *TCF7L2*  *(rs7903146)* | WTCCC – 58BC/UKBS | -0.03  (-0.10, 0.04) | 1829 | 0.4 | 0.02  (-0.06, 0.10) | [1386] | 0.00005  (-0.08, 0.12) | [1480] | 0.7* |
| RSA | -0.10  (-0.15, -0.05) | 2923 | 0.0003 | -0.02  (-0.06, 0.03) | | [3375] | | 0.5 |
| RSB | -0.04  (-0.16, 0.08) | 572 | 0.5 | -0.02  (-0.09, 0.04) | | [1546] | | 0.5 |
| **META-ANALYSIS** | **-0.07**  **(-0.11, -0.03)** | **-** | **0.0006** | **-0.01**  **(-0.04, 0.02)** | | | | **0.4** |
| *SLC30A8*  *(rs31266634)* | WTCCC – 58BC/UKBS | -0.11  (-0.20-0.03) | 1546 | 0.005 | -0.05  (-0.13, 0.03) | [1397] | -0.02  (-0.09, 0.10) | [1480] | 0.2* |
| RSA | -0.04  (-0.10, 0.01) | 2972 | 0.1 | -0.02  (-0.06, 0.02) | | [3423] | | 0.3 |
| RSB | 0.04  (-0.09, 0.17) | 574 | 0.5 | 0.04  (-0.03, 0.11) | | [1257] | | 0.3 |
| **META-ANALYSIS** | **-0.05**  **(-0.10, -0.01)** | **-** | **0.01** | **-0.03**  **(-0.090.02)** | | | | **0.2** |

There was no evidence for heterogeneity in meta-analyses presented above.

Effects and meta-analysis represent sex-specific log10 BMI zscores and rs7903146 is taken from imputed data in the WTCCC samples.

Two estimates for WTCCC controls are presented before meta analysis in order to represent data derived from the 1958 Birth Cohort (58BC) and that of the UK Blood Service (UKBS) collection. * represents meta-analysis p value across WTCCC controls.

The three loci shown above are those for which best evidence for a stratification effect for T2D association was found.

**Figure S1.**

Comparison of basic analyses and stratified study design within the WTCCC and follow-up samples


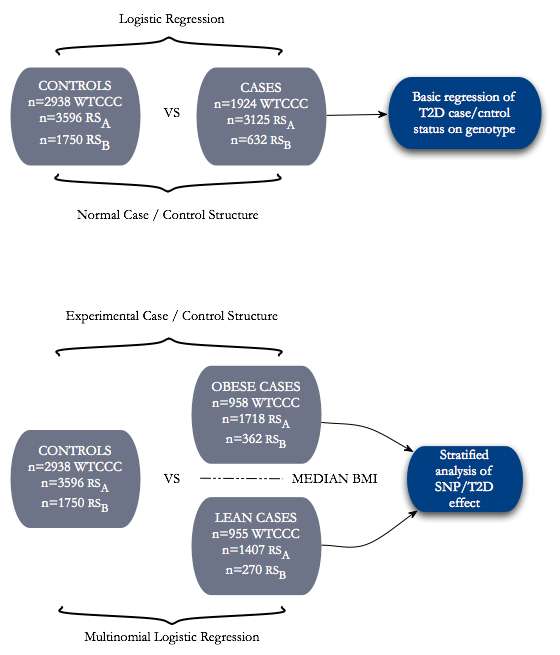


**Figure S2.**


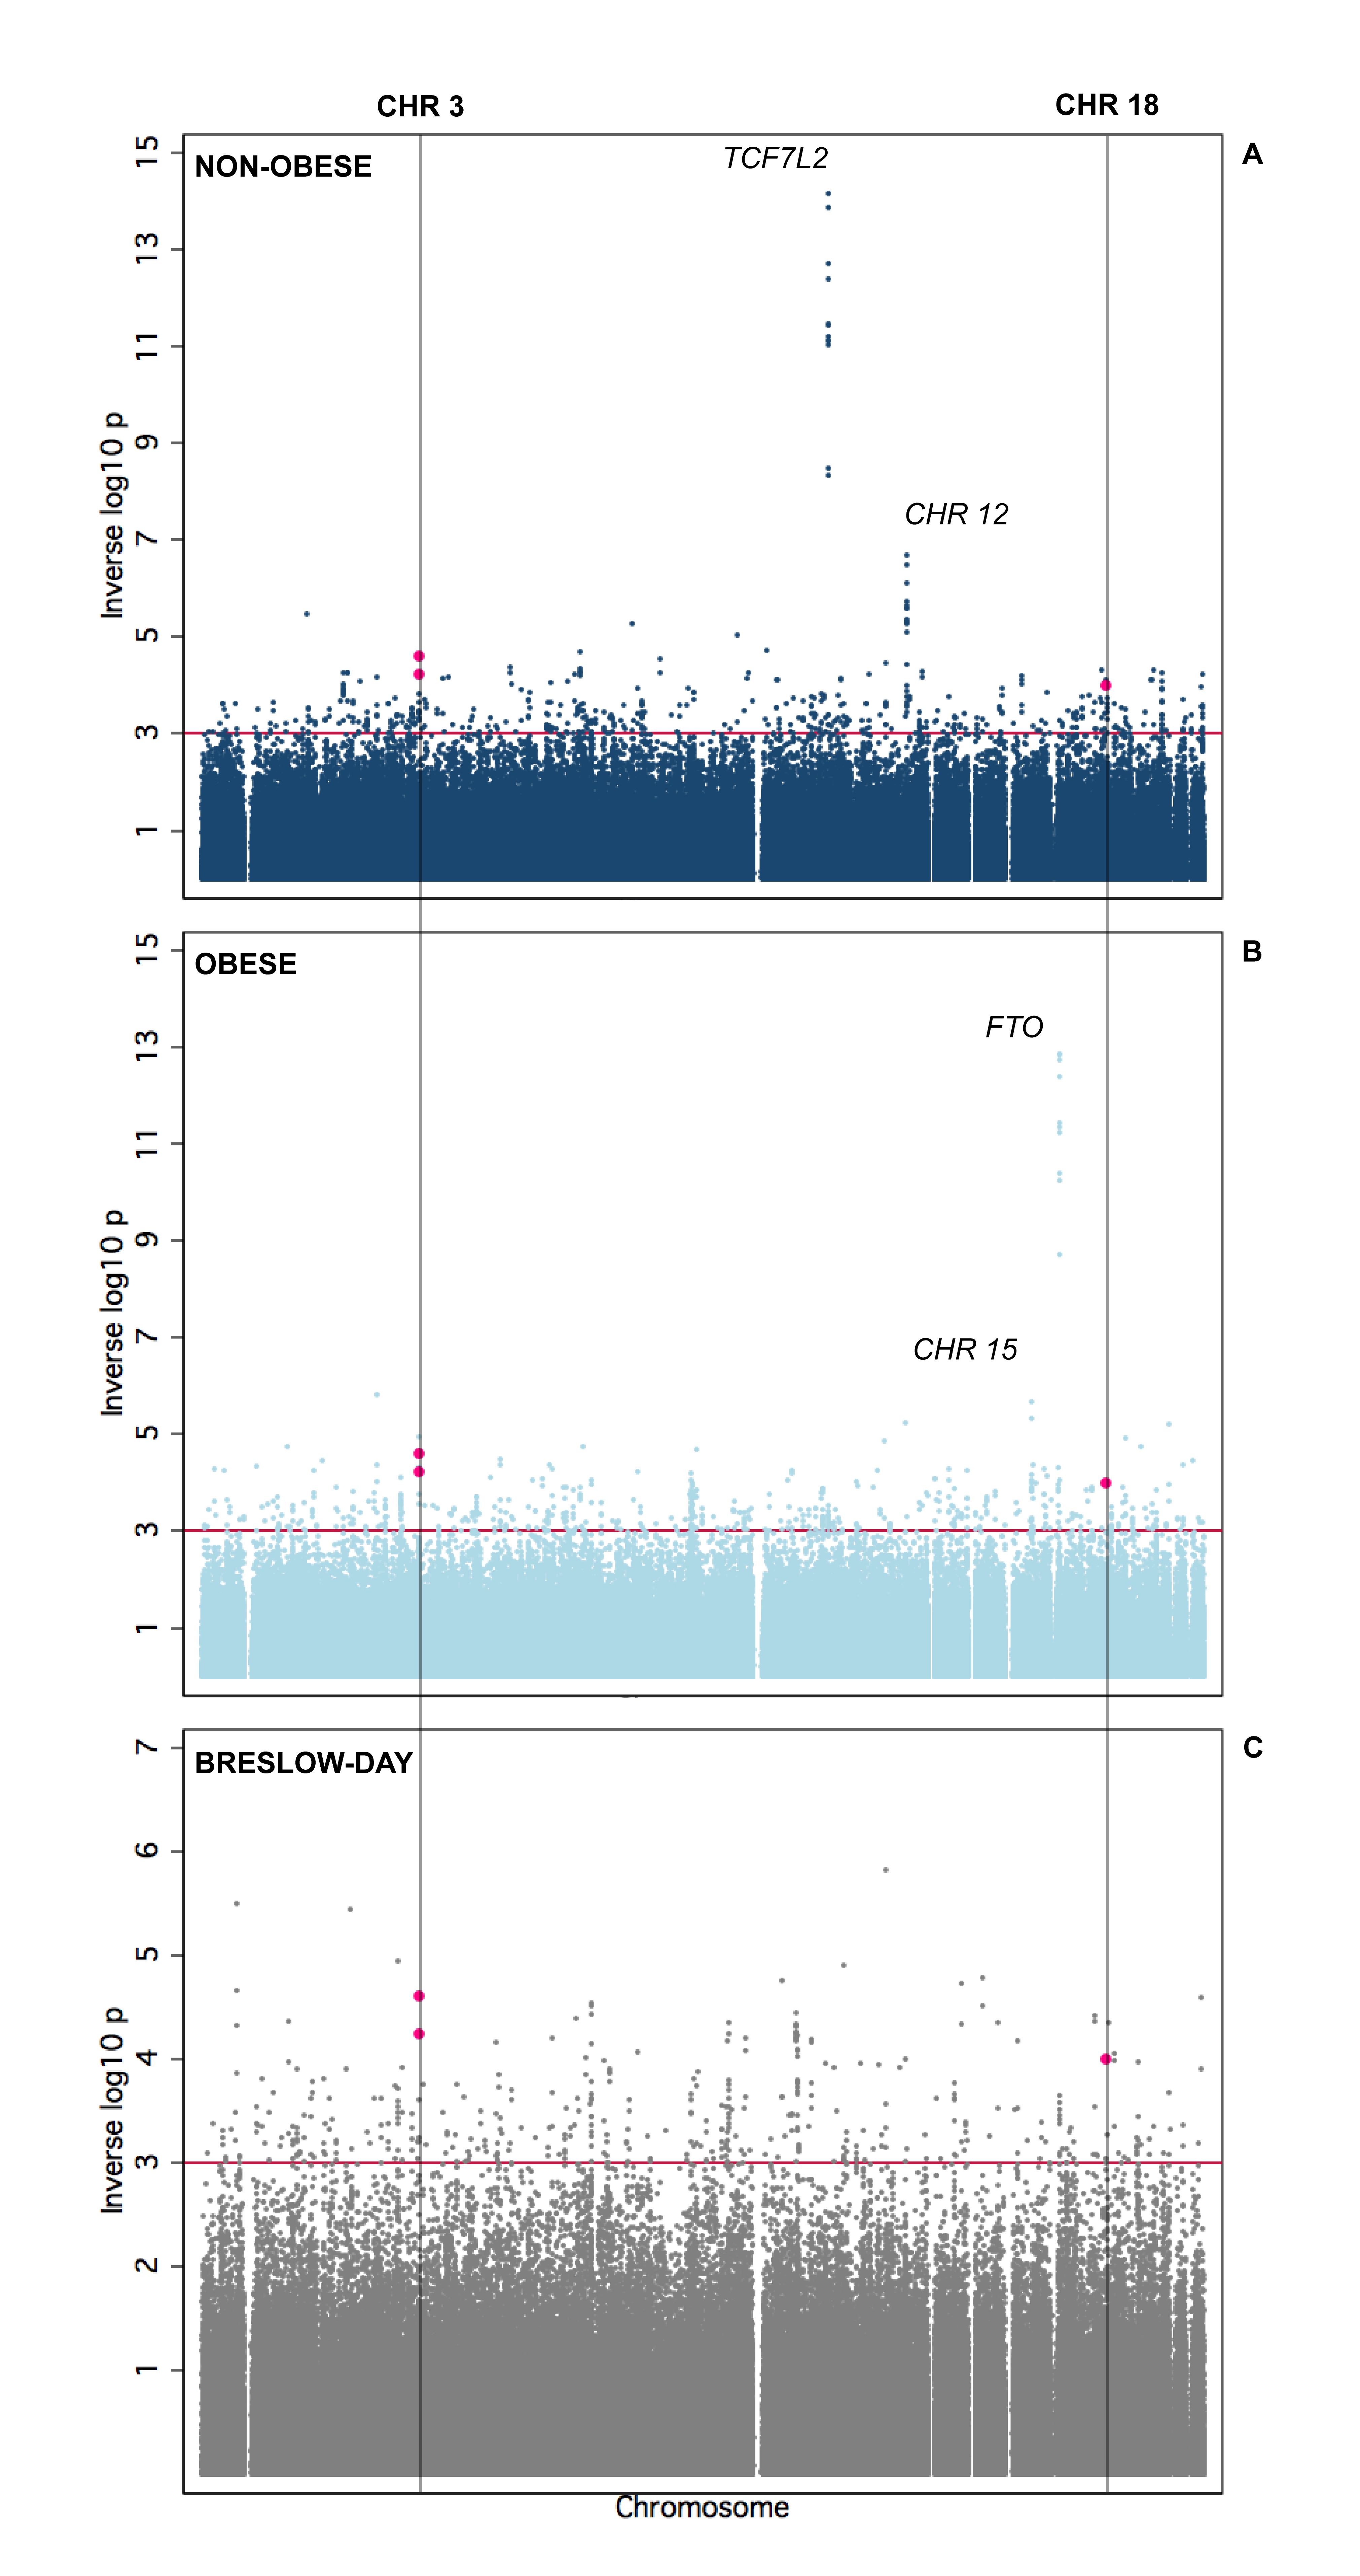
Comparison of obese and non-obese scan profiles with test for difference by Breslow-Day analysis.

Plots A, B and C represent genomewide association test profiles for non-obese T2D cases, obese T2D cases and a Breslow Day test for heterogeneity respectively. Pink dots in plots A and B represent SNPs rs16827446(chr3) rs1497313(chr3) and rs917836(chr18) which show both obese or non-obese scan results p=<1x10-3 and Breslow-Day results p=<1x10-3.
